# Supplementary material for: Loss of HtrA1 serine protease induces synthetic modulation of aortic vascular smooth muscle cells
Source: PubMed Central journal article supplement (PMC5955505; doi:10.1371/journal.pone.0196628), 2018-05-16
Supplement: pone.0196628.s002.pdf [file pone.0196628.s002.pdf]

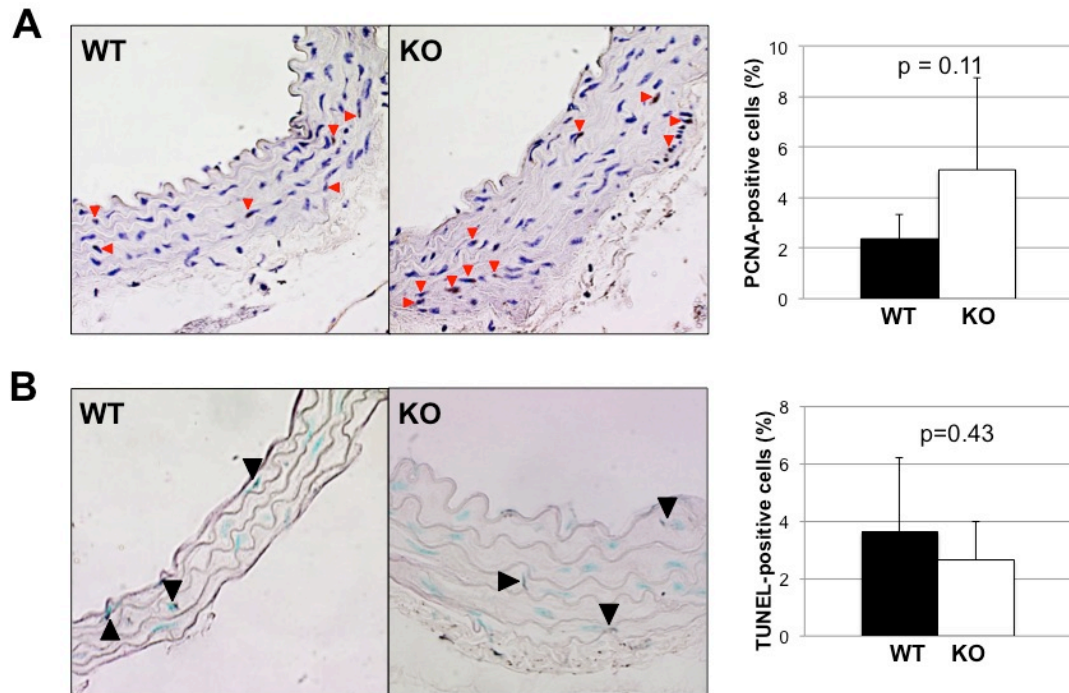

**S2 Fig. PCNA immunostaining and TUNEL staining of the *HtrAI*<sup>-/-</sup> mouse aorta.** (A) Cross-sectioned aorta tissues from 40-week-old wild type (WT) and *HtrAI*<sup>-/-</sup> (KO) mice were stained with anti-PCNA antibody and counterstained with hematoxylin. Red arrowheads indicate PCNA-positive cells, and percentages of PCNA-positive cells are shown in the graph on the right. Bars represent means  $\pm$  SD (WT, n=6; KO, n=5). (B) Cross-sectioned aorta tissues from 52-week-old mice were stained with TUNEL and counterstained with methyl green. Arrowheads indicate TUNEL-positive cells, and percentages of TUNEL-positive cells are shown in the graph on the right. Bars represent means  $\pm$  SD (n=6). p values were calculated by Student's *t*-test.
