# Supplementary material for: Loss of HtrA1 serine protease induces synthetic modulation of aortic vascular smooth muscle cells
Source: PubMed Central journal article supplement (PMC5955505; doi:10.1371/journal.pone.0196628), 2018-05-16
Supplement: pone.0196628.s006.pdf [file pone.0196628.s006.pdf]

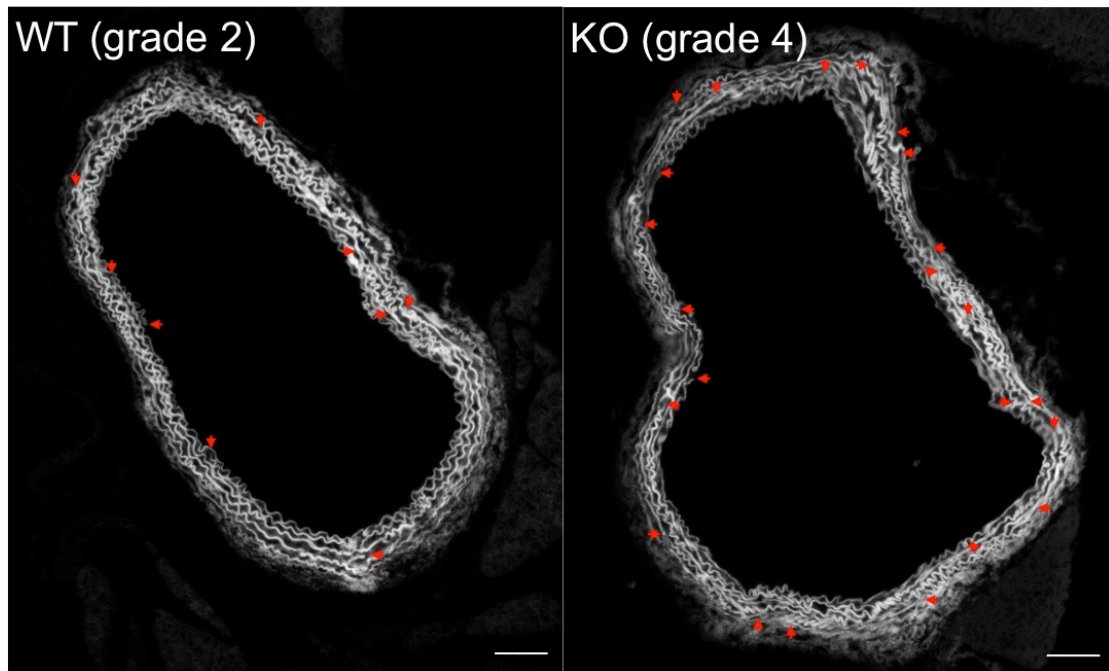

**S6 Fig. Elastic fiber degradation in the aortic media of 52-wo *HtrA1*<sup>-/-</sup> mice.** Grading of elastic fiber degradation was carried out using elastic van Gieson-stained sections based on a reported method provided in S1 File. Pictures shown are typical images of the wild type (WT) aorta (left) and the *HtrA1*<sup>-/-</sup> (KO) aorta (right). Red arrows indicate damaged elastic fibers. Scale bar=100  $\mu$ m.
