# Supplementary material for: Loss of HtrA1 serine protease induces synthetic modulation of aortic vascular smooth muscle cells
Source: PubMed Central journal article supplement (PMC5955505; doi:10.1371/journal.pone.0196628), 2018-05-16
Supplement: pone.0196628.s007.pdf [file pone.0196628.s007.pdf]

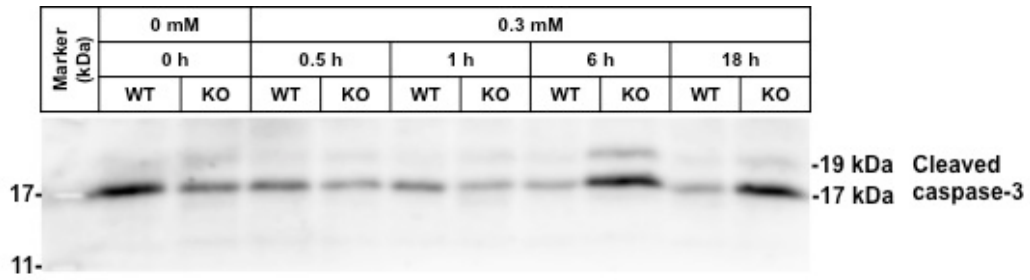

**S7 Fig. Original uncropped blot of Fig 5D.** Effect of H<sub>2</sub>O<sub>2</sub> on the expression of cleaved caspase-3 on wild type (WT) and *HtrAI*<sup>-/-</sup> (KO) mouse VSMCs. WT and *HtrAI*<sup>-/-</sup> VSMCs were treated with 0.3 mM H<sub>2</sub>O<sub>2</sub> in medium containing 0.1% FBS. Cell lysates were prepared at the time points indicated, separated by SDS- PAGE, and analyzed by Western blot for cleaved caspase-3. The anti cleaved caspase-3 antibody detected the large fragments (17/19kDa).
