# Supplementary material for: Loss of HtrA1 serine protease induces synthetic modulation of aortic vascular smooth muscle cells
Source: PubMed Central journal article supplement (PMC5955505; doi:10.1371/journal.pone.0196628), 2018-05-16
Supplement: pone.0196628.s008.pdf [file pone.0196628.s008.pdf]

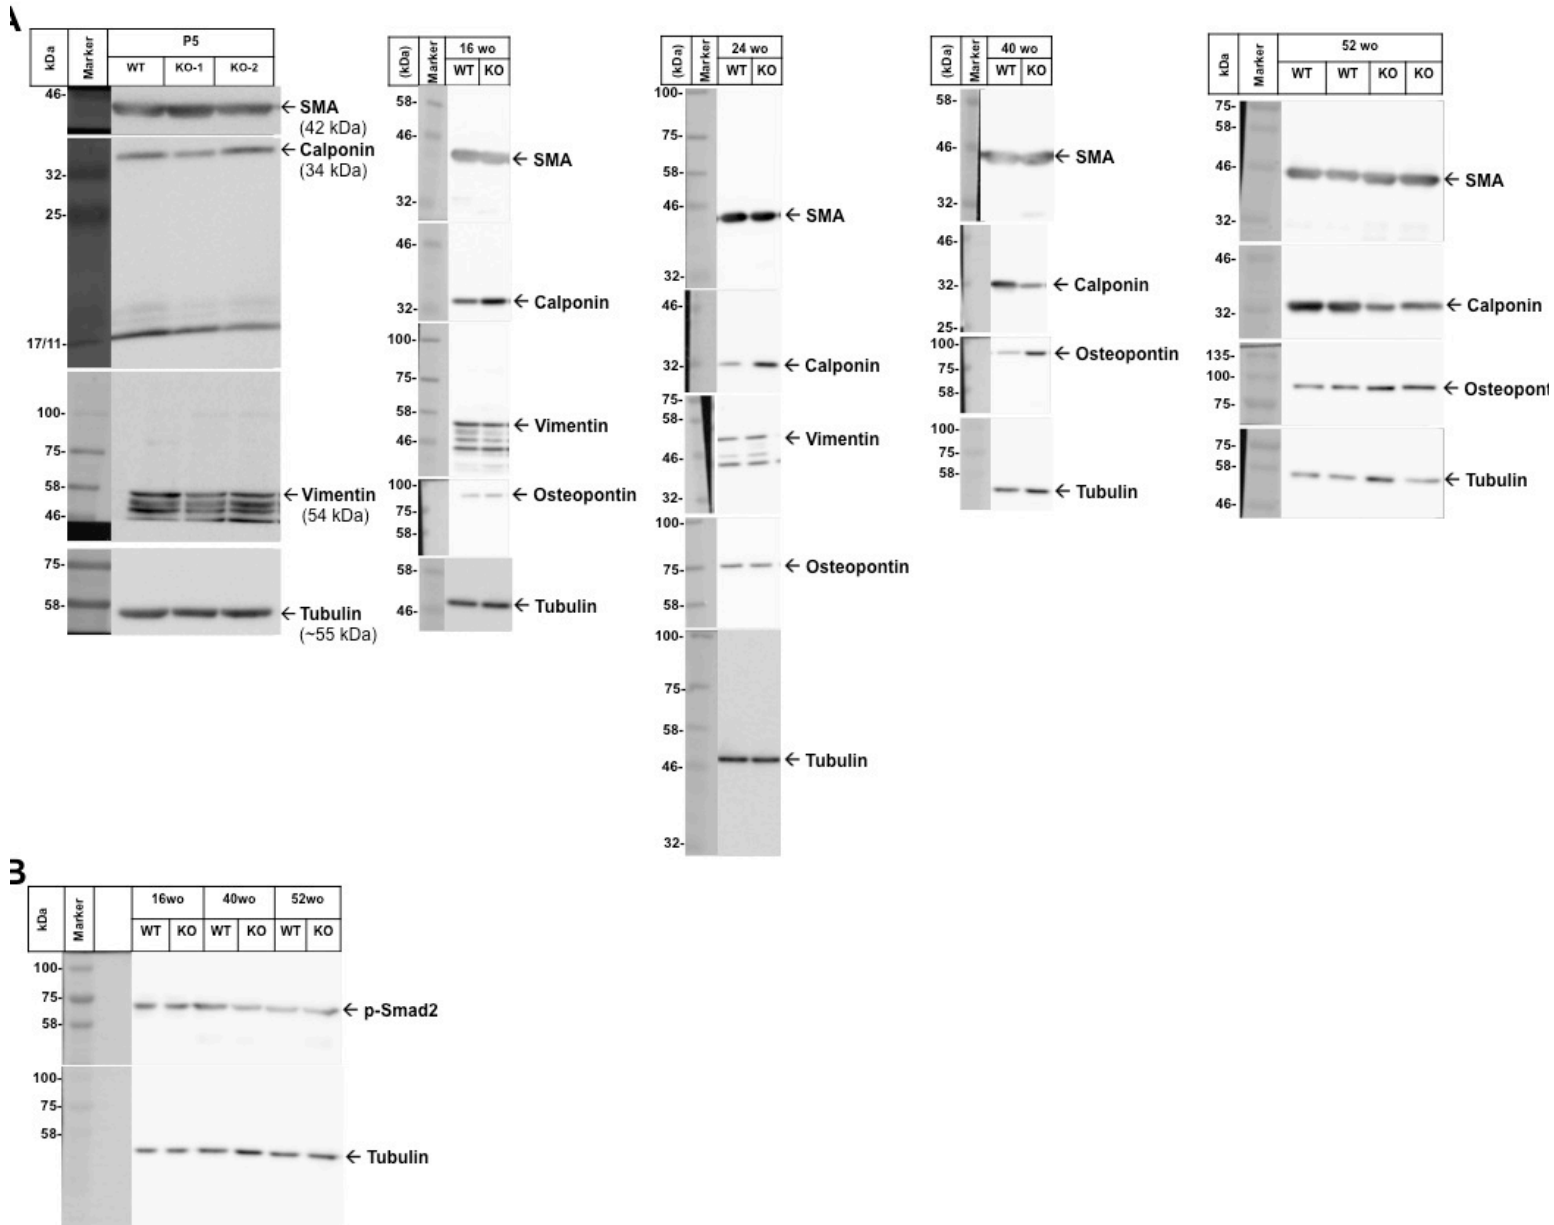

**S8 Fig. Original uncropped blot of Fig 6. (A)** Expression of VSMC contractile and synthetic markers in aortas of wild type (WT) and *HtrAI*<sup>-/-</sup> (KO) mice. **(B)** Phosphorylation of Smad2 in aortas of WT and *HtrAI*<sup>-/-</sup> mice. Pictures of molecular size markers (Blue Prestained Protein Standard, #P7706S, New England BioLabs) for each blot were taken under visible light with a Luminescent Image Analyzer LAS4000 (Fujifilm), and were imprinted to each respective blot.
