# Supplementary material for: Loss of HtrA1 serine protease induces synthetic modulation of aortic vascular smooth muscle cells
Source: PubMed Central journal article supplement (PMC5955505; doi:10.1371/journal.pone.0196628), 2018-05-16
Supplement: pone.0196628.s009.pdf [file pone.0196628.s009.pdf]

## **Supplementary methods**

### **Grading of elastin degradation**

The grading of elastic fiber degradation was carried out based on the extent of elastic fiber fragmentation and branching, according to a reported method [1] with the following modifications. One point was given to one incident of elastic fiber fragmentation or branching; the total points were summated to calculate “score” for each section from each aorta. Grade 1 = none (score 0-7); grade 2 = minimal (8-15); grade 3 = moderate (16-23); grade 4 = severe (>23) (adapted from Deckert *et al* [1]).

### **PCNA immunostaining and TUNEL assay**

To assess VSMC proliferation in the aorta, paraffin-embedded aorta sections were immunostained for PCNA (Biovision, 1:400). The sections were also subjected to a TUNEL assay using an in situ apoptosis detection kit (Takara) according to the manufacturer’s instruction.

### **Reference**

1. Deckert V, Kretz B, Habbout A, Raghay K, Labbe J, Abello N, et al. Development of abdominal aortic aneurysm is decreased in mice with plasma phospholipid transfer protein deficiency. *Am. J. Pathol.* 2013;183:975-986.
