# Supplementary material for: Loss of HtrA1 serine protease induces synthetic modulation of aortic vascular smooth muscle cells
Source: PubMed Central journal article supplement (PMC5955505; doi:10.1371/journal.pone.0196628), 2018-05-16
Supplement: pone.0196628.s015.pdf [file pone.0196628.s015.pdf]

**S1 Table. Growth factors and inhibitors used for cell culture**

| <b>Growth factor/inhibitor</b>   | <b>Catalogue number</b> | <b>Manufacturer</b> | <b>Concentration</b> |
|----------------------------------|-------------------------|---------------------|----------------------|
| Recombinant murine PDGF-BB       | #315-18                 | Peptotech           | 20 ng/ml             |
| Recombinant human IGF-1          | 291-G1                  | R&D Systems         | 10 ng/ml             |
| Recombinant human TGF- $\beta$ 1 | #100-21                 | Peptotech           | 10 ng/ml             |
| SB203580                         | BML-EI286               | Enzo Life Sciences  | 10 $\mu$ M           |
| SP600125                         | 10010466                | Cayman Chemical     | 10 $\mu$ M           |
| SB431542                         | 13031                   | Cayman Chemical     | 10 $\mu$ M           |
| N-acetylcysteine (NAC)           | A9165                   | Sigma Aldrich       | 5 $\mu$ M            |
| Bay11-7082                       | 10010266                | Cayman Chemical     | 1 $\mu$ M            |
| U0126                            | 70970                   | Cayman Chemical     | 10 $\mu$ M           |
