# Supplementary material for: Loss of HtrA1 serine protease induces synthetic modulation of aortic vascular smooth muscle cells
Source: PubMed Central journal article supplement (PMC5955505; doi:10.1371/journal.pone.0196628), 2018-05-16
Supplement: pone.0196628.s016.pdf [file pone.0196628.s016.pdf]

**S2 Table. Forward (F) and reverse (R) primers used for qRT-PCR**

| <b>Gene amplified</b> | <b>Primer sequences</b>                                       |
|-----------------------|---------------------------------------------------------------|
| <i>Mouse mmp2</i>     | F, 5'-CAAGTTCCCCGGCGATGTC-3'<br>R, 5'-TTCTGGTCAAGGTCACCTGT-3' |
| <i>Mouse mmp9</i>     | F, 5'-GCGTCGTGATCCCCACTTAC-3'<br>R, 5'-CAGGCCGAATAGGAGCGTC-3' |
| <i>Mouse gapdh</i>    | F, 5'-AACATCATCCCTCATCCAC-3'<br>R, 5'-CCCTGTTGCTGTAGCCGTAT-3' |
