# Supplementary material for: Loss of HtrA1 serine protease induces synthetic modulation of aortic vascular smooth muscle cells
Source: PubMed Central journal article supplement (PMC5955505; doi:10.1371/journal.pone.0196628), 2018-05-16
Supplement: pone.0196628.s017.pdf [file pone.0196628.s017.pdf]

**S3 Table. Primary antibodies used for immunostaining**

| <b>Antibody</b>                          | <b>Catalogue number</b> | <b>Reference/Manufacturer</b>           | <b>Dilution</b>                           |
|------------------------------------------|-------------------------|-----------------------------------------|-------------------------------------------|
| Anti-HtrA1                               | -                       | [1]                                     | 1:1,000                                   |
| Anti-HtrA3                               | -                       | [2]                                     | 1:1,000                                   |
| Anti-smooth muscle $\alpha$ -actin (SMA) | ab5694                  | Abcam                                   | 1:100                                     |
| Anti-calponin                            | ab46794                 | Abcam                                   | 1:400                                     |
| Anti-vimentin                            | ab45939                 | Abcam                                   | 1:100 (for aorta) or<br>1:400 (for VSMCs) |
| Anti-osteopontin                         | MPIIIB101               | Developmental Studies<br>Hybridoma Bank | 1:50 (for aorta) or<br>1:100 (for VSMCs)  |
| Anti-cleaved caspase 3 (Asp175) (5A1E)   | #9664                   | Cell Signaling<br>Technology            | 1:400                                     |

**References:**

1. Oka C, Tsujimoto R, Kajikawa M, Koshiha-Takeuchi K, Ina J, Yano M, et al. HtrA1 serine protease inhibits signaling mediated by Tgf $\beta$  family proteins. *Development*. 2004;131:1041-1053.
2. Tocharus J, Tsuchiya A, Kajikawa M, Ueta Y, Oka C, Kawaichi M. Developmentally regulated expression of mouse HtrA3 and its role as an inhibitor of TGF- $\beta$  signaling. *Dev. Growth Differ*. 2004;46:257–274.
