# Supplementary material for: Loss of HtrA1 serine protease induces synthetic modulation of aortic vascular smooth muscle cells
Source: PubMed Central journal article supplement (PMC5955505; doi:10.1371/journal.pone.0196628), 2018-05-16
Supplement: pone.0196628.s018.pdf [file pone.0196628.s018.pdf]

**S4 Table. Primary antibodies used for Western blotting**

| <b>Antibody</b>                           | <b>Catalogue number</b> | <b>Reference/<br/>Manufacturer</b>      | <b>Dilution</b> |
|-------------------------------------------|-------------------------|-----------------------------------------|-----------------|
| Anti-HtrA1                                | -                       | [1]                                     | 1:2,000         |
| Anti-SMA                                  | ab5694                  | Abcam                                   | 1:5,000         |
| Anti-calponin                             | ab46794                 | Abcam                                   | 1:50,000        |
| Anti-vimentin                             | ab45939                 | Abcam                                   | 1:5,000         |
| Anti-osteopontin                          | MPIIIB101               | Developmental Studies<br>Hybridoma Bank | 1:1,000         |
| Anti-p-Smad2/3 (Ser423/425)               | sc-11769                | Santa Cruz Biotechnology                | 1:2,000         |
| Anti-cleaved caspase 3<br>(Asp175) (5A1E) | #9664                   | Cell Signaling<br>Technology            | 1:1,000         |
| Anti- $\alpha$ -tubulin                   | t9026                   | Sigma                                   | 1:2,000         |

**References:**

1. Oka C, Tsujimoto R, Kajikawa M, Koshiha-Takeuchi K, Ina J, Yano M, et al. HtrA1 serine protease inhibits signaling mediated by Tgf $\beta$  family proteins. *Development*. 2004;131:1041-1053.
